# Supplementary material for: Fast self-navigated wall shear stress measurements in the murine aortic arch using radial 4D-phase contrast cardiovascular magnetic resonance at 17.6 T
Source: Springer Nature journal article supplement (doi:10.1186/s12968-019-0566-z), 2019-01-01

# Figure S1

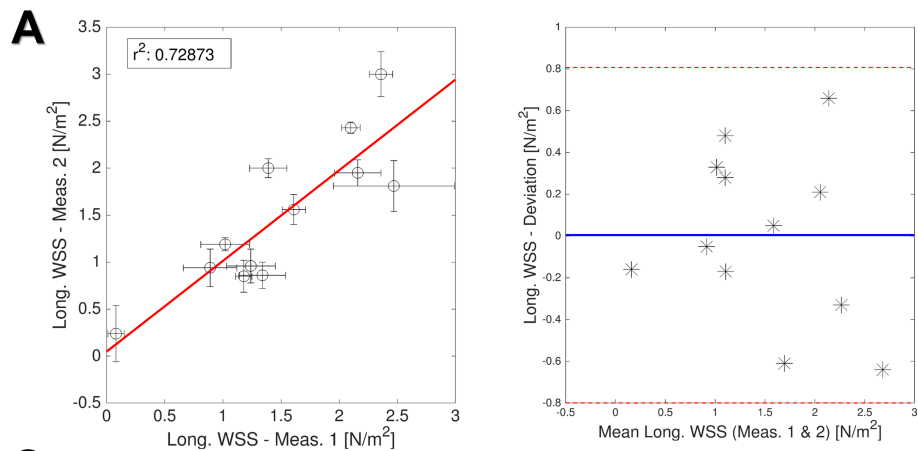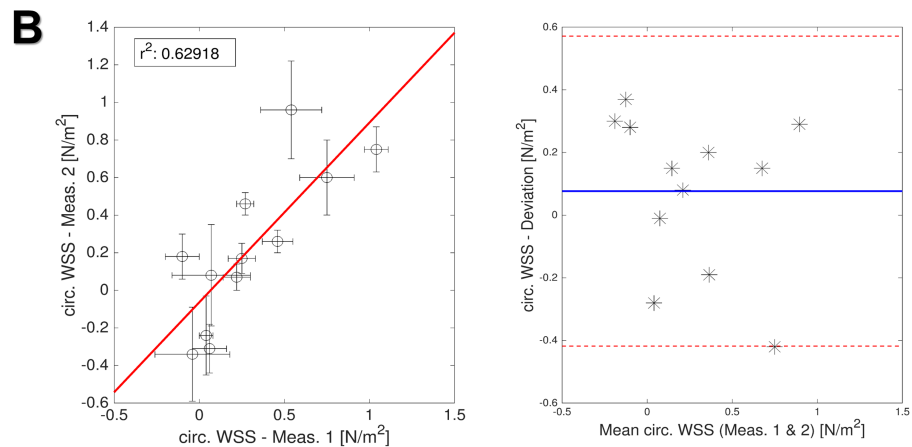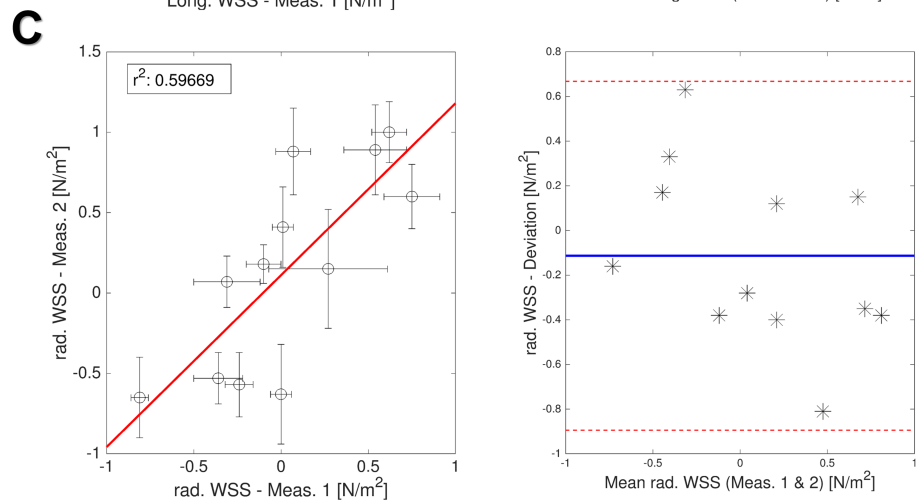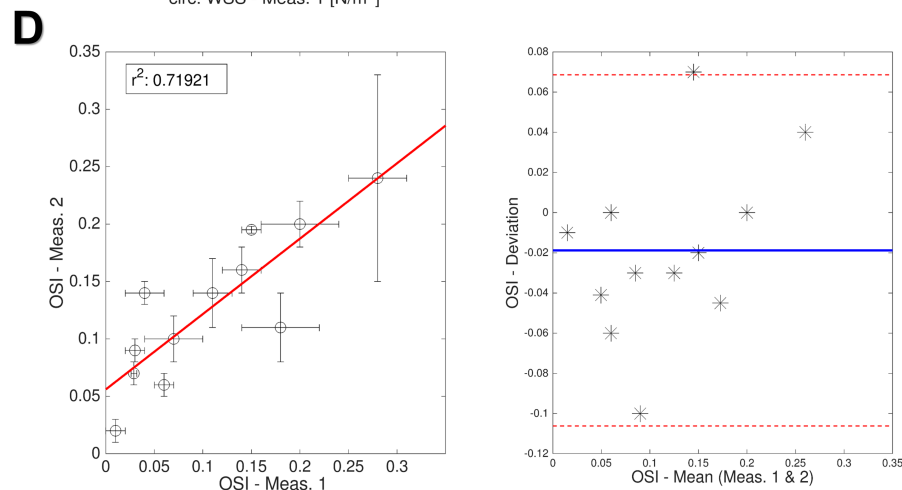

# Figure S2

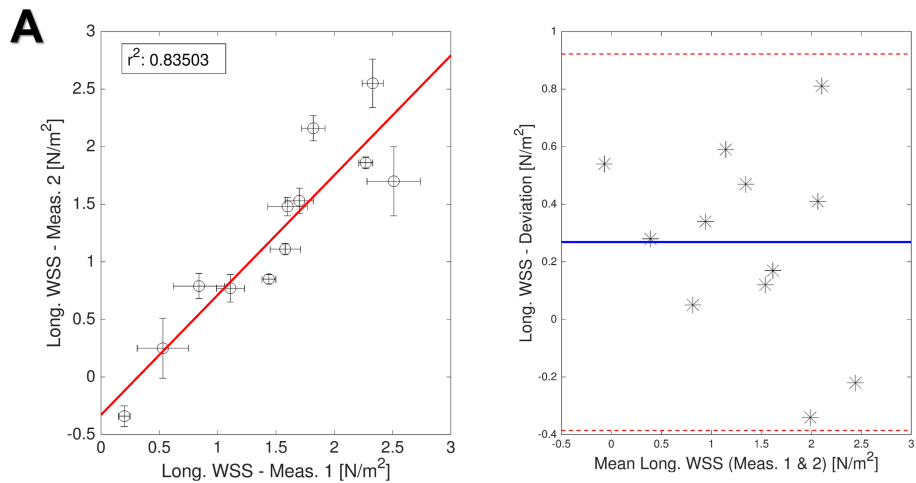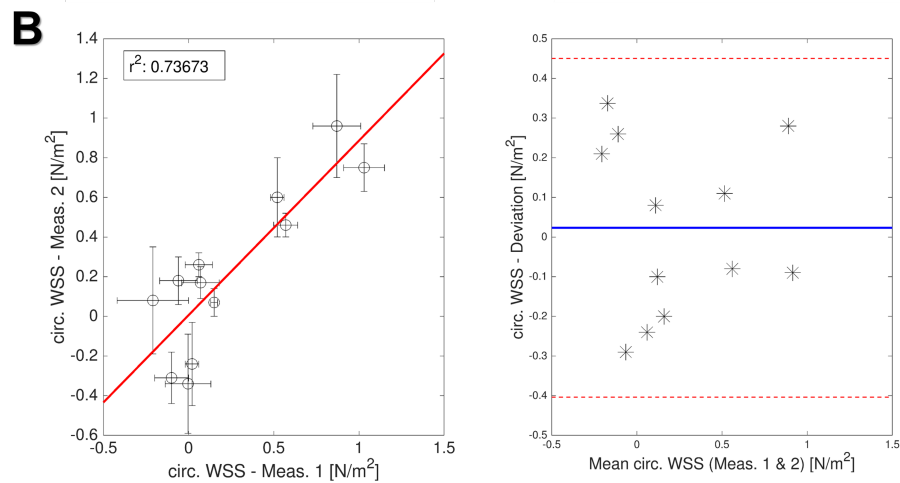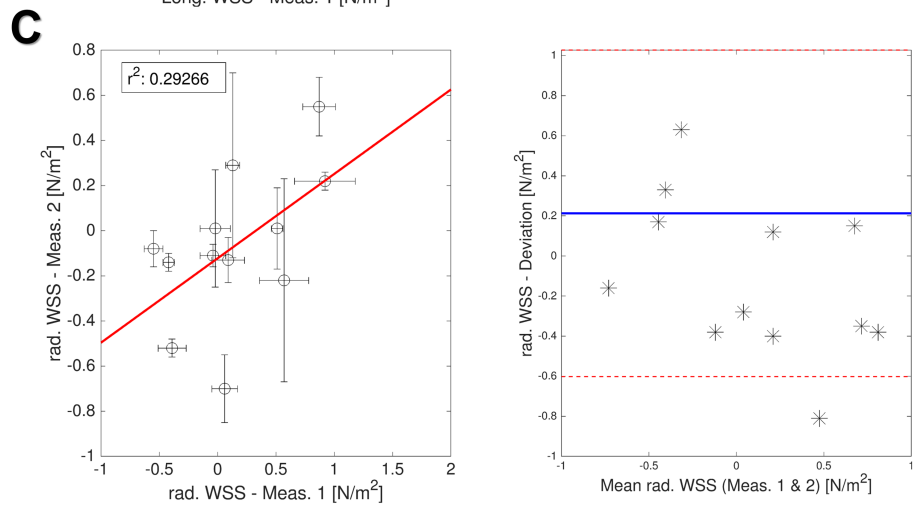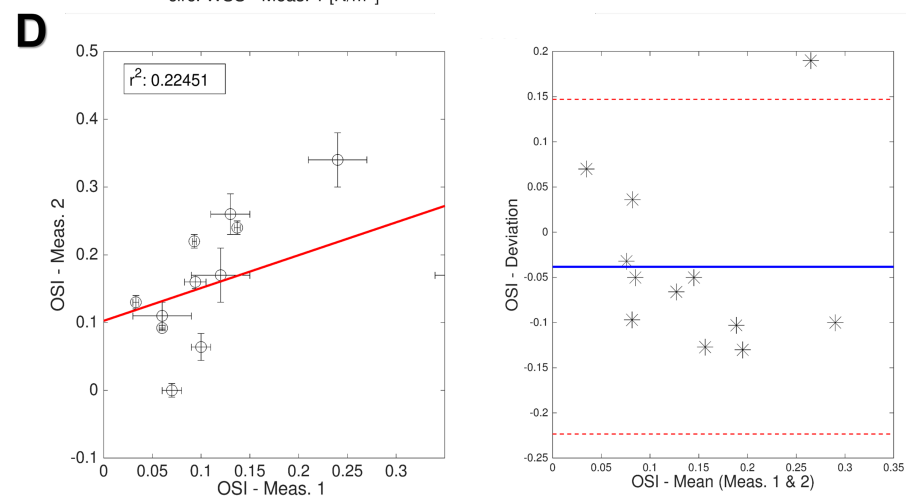

# Figure S3

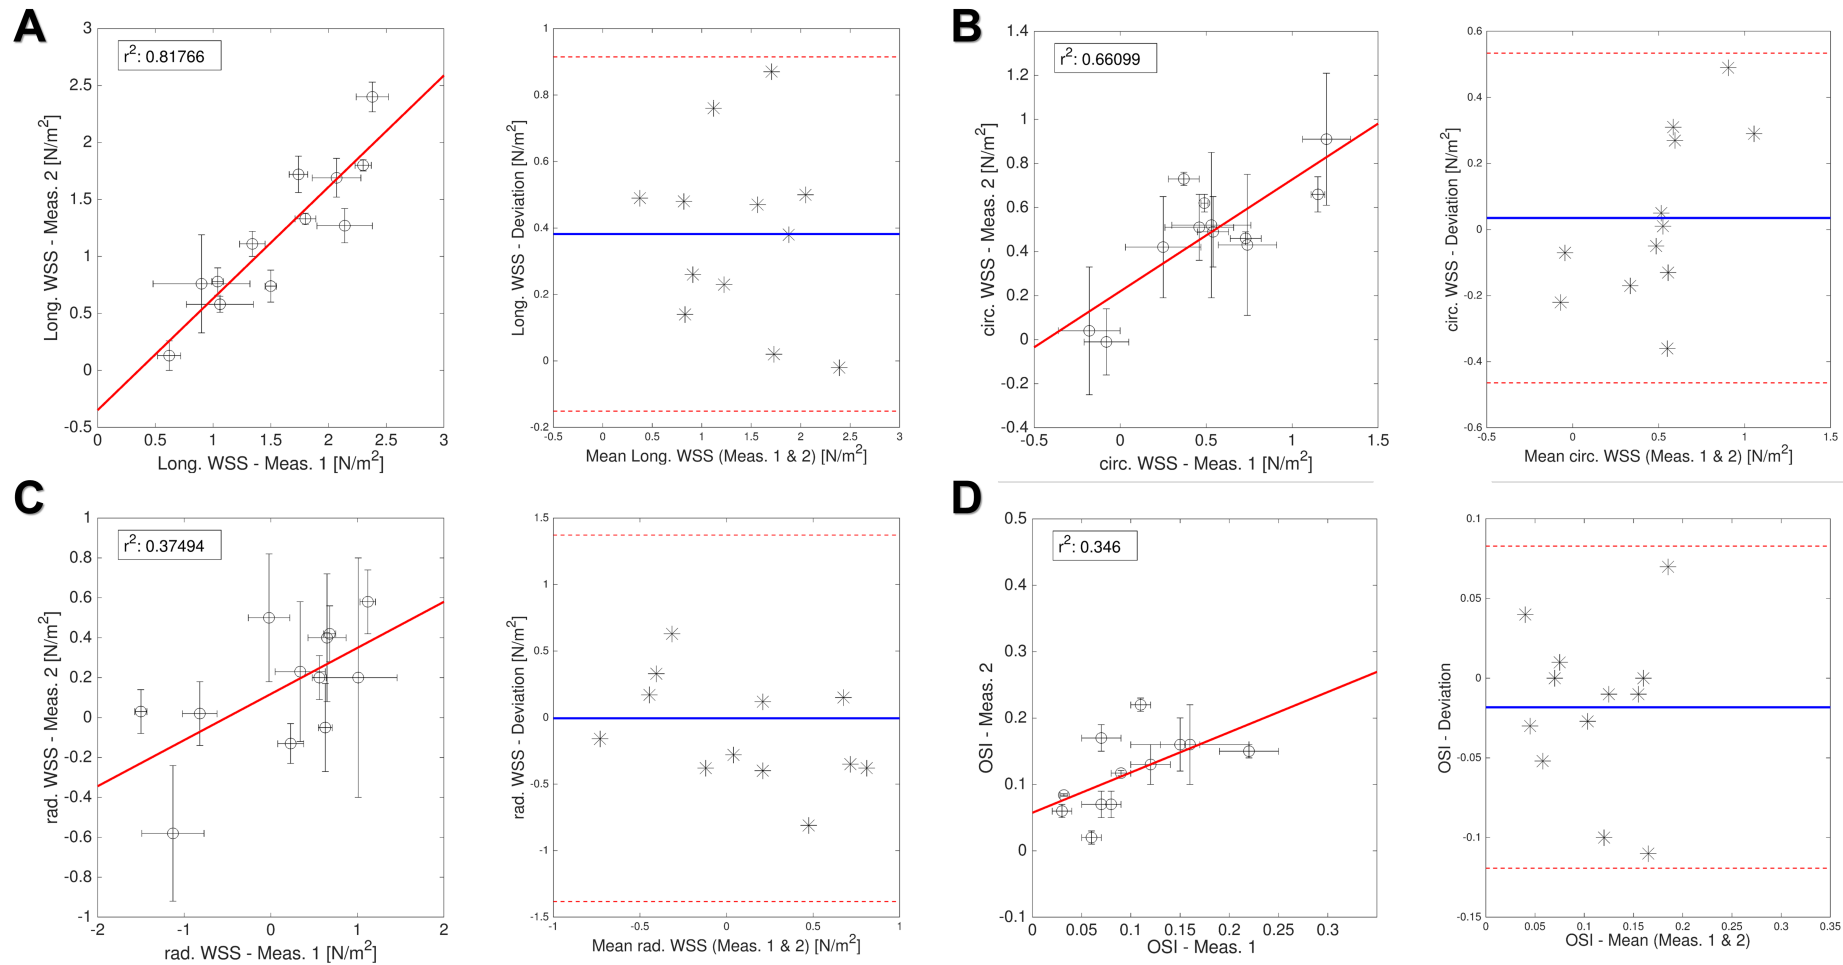

# Figure S4

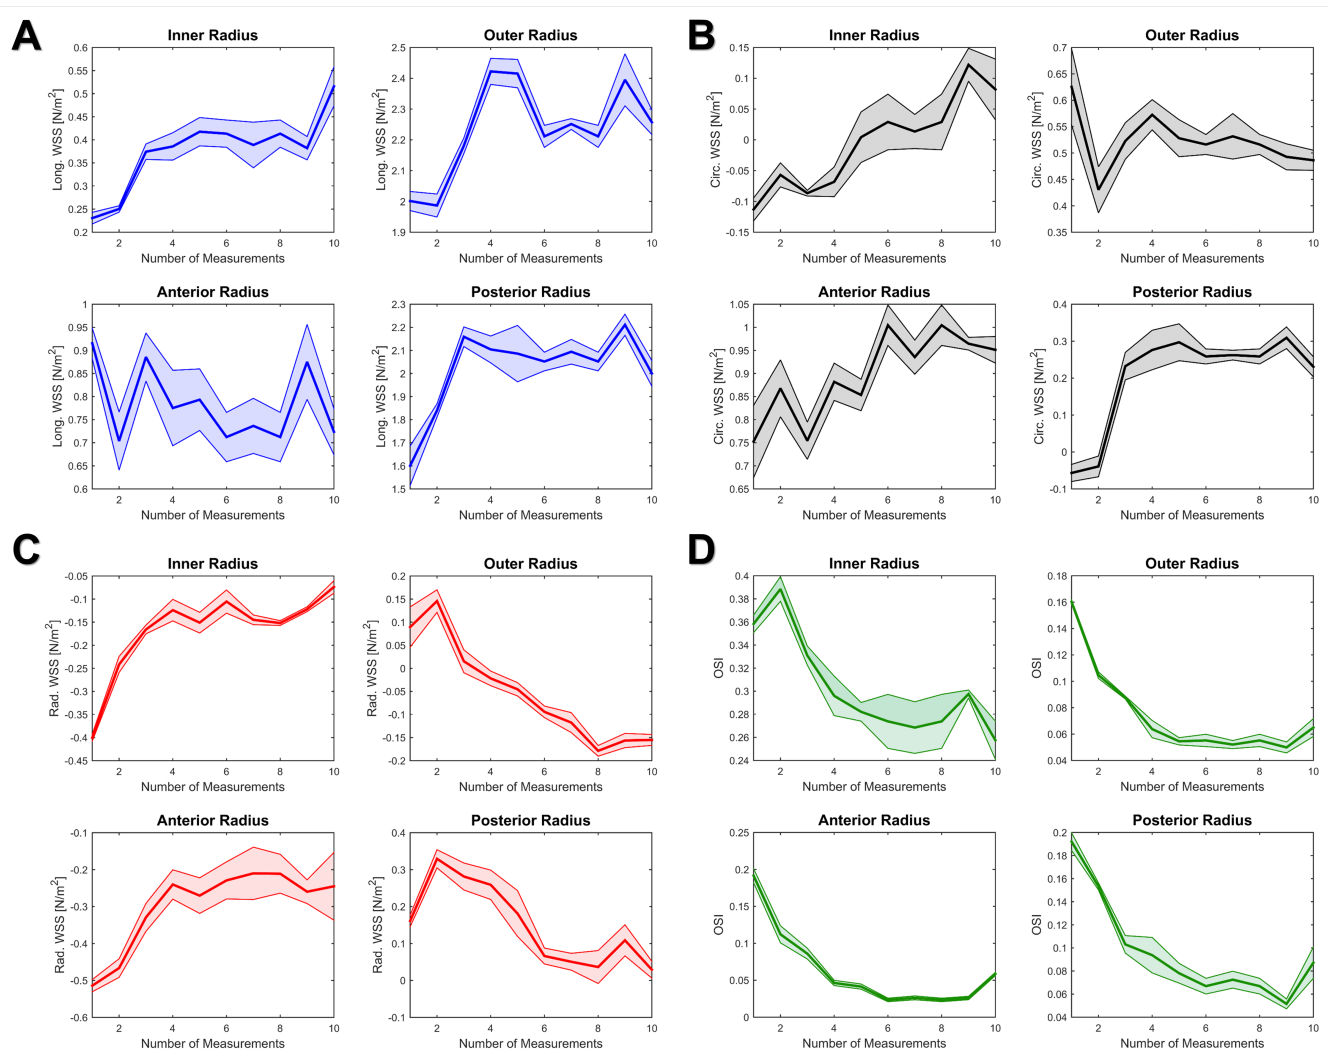

# Figure S5

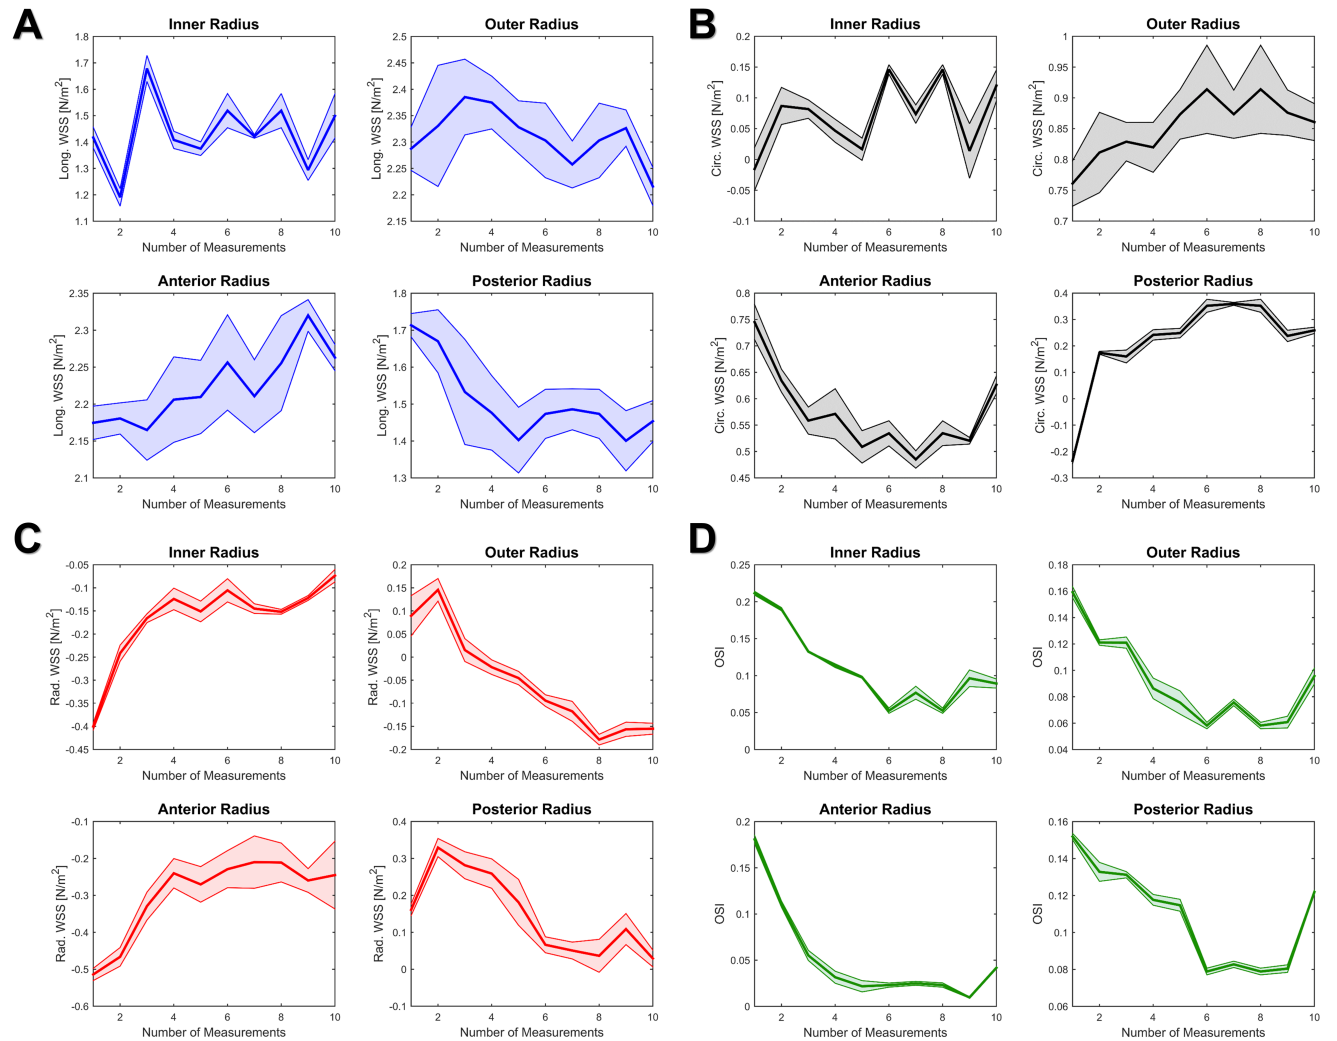

# Figure S6

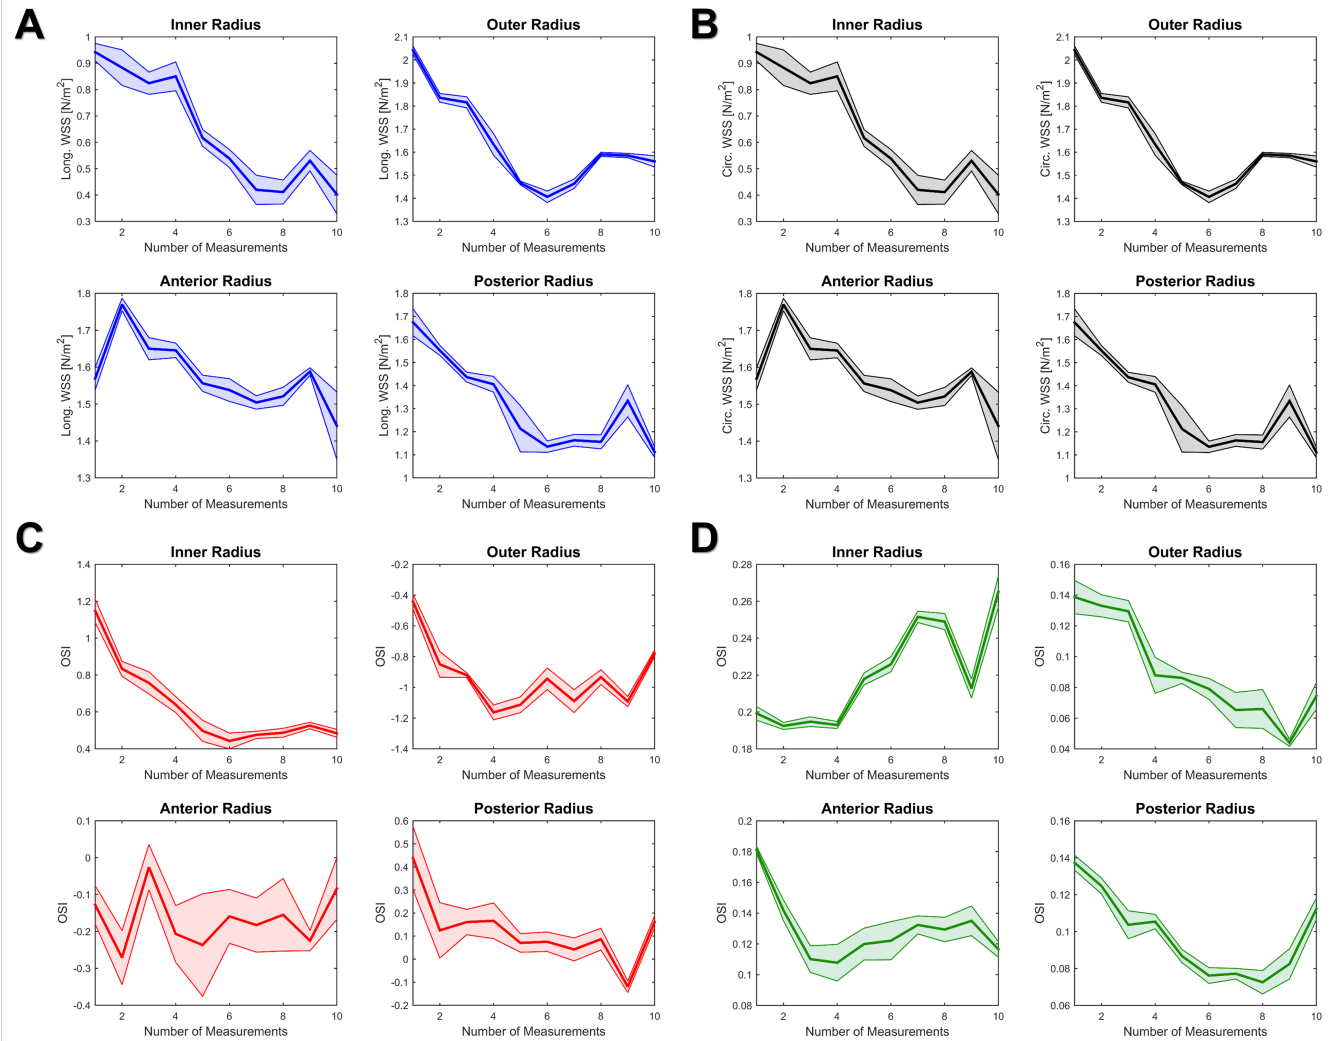

Supplement: MOESM1 [file 17270484]
